# Supplementary material for: Cyanide-bridged coordination polymers constructed from lanthanide ions and octacyanometallate building-blocks
Source: Royal Society of Chemistry journal article supplement (doi:10.1039/c8qi00357b), 2018-01-01
Supplement: c8qi00357b1.pdf [file c8qi00357b1.pdf]

# Cyanide-bridged coordination polymers constructed from lanthanide ions and octacyanomethylate building-blocks

Yuan Gao,<sup>a</sup> Marta Viciano-Chumillas,<sup>b</sup> Ana Maria Toader,<sup>c</sup> Simon J. Teat,<sup>d</sup> Marilena Ferbinteanu,<sup>e\*</sup> Stefania Tanase<sup>a\*</sup>

<sup>a</sup>Van 't Hoff Institute for Molecular Sciences, University of Amsterdam, Science Park 904, 1098XH Amsterdam, The Netherlands. E-mail: [s.grecea@uva.nl](mailto:s.grecea@uva.nl)

<sup>b</sup>Instituto de Ciencia Molecular (ICMol), Universidad de Valencia, c/ Catedrático José Beltrán, 2, 46980 Paterna, Spain.

<sup>c</sup>Institute of Physical Chemistry, Splaiul Independentei 202, Bucharest 060021, Romania.

<sup>d</sup>Advanced Light Source, Lawrence Berkeley National Laboratory, Berkeley, USA.

<sup>e</sup>Faculty of Chemistry, Inorganic Chemistry Department, University of Bucharest, Dumbrava Rosie 23, Bucharest 020462, Romania. E-mail: [marilena.cimpoesu@g.unibuc.ro](mailto:marilena.cimpoesu@g.unibuc.ro)

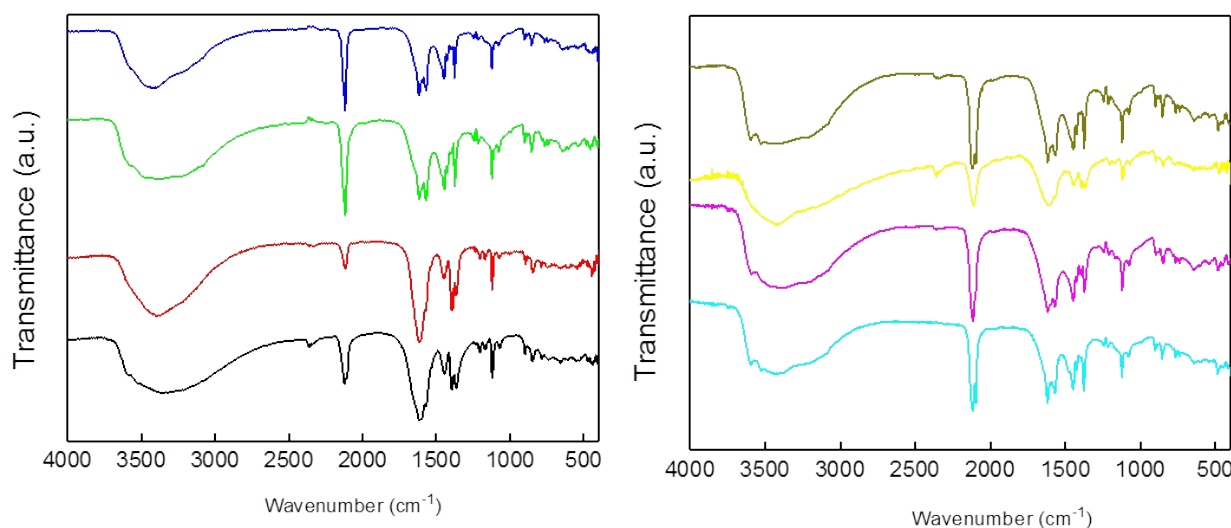

**Figure S1.** The FTIR of  $\{KH[Ln_2(2,3\text{-pzdc})_2(\text{CH}_3\text{OH})(\text{H}_2\text{O})_7][\text{Mo}(\text{CN})_8]\} \cdot 5\text{H}_2\text{O}$  (left) and  $\{KH[Ln_2(2,3\text{-pzdc})_2(\text{CH}_3\text{OH})(\text{H}_2\text{O})_7][\text{W}(\text{CN})_8]\} \cdot 5\text{H}_2\text{O}$  (right). Compounds **1** (black), **2** (red), **3** (green), **4** (blue), **5** (light blue), **6** (pink), **7** (yellow), **8** (tan).

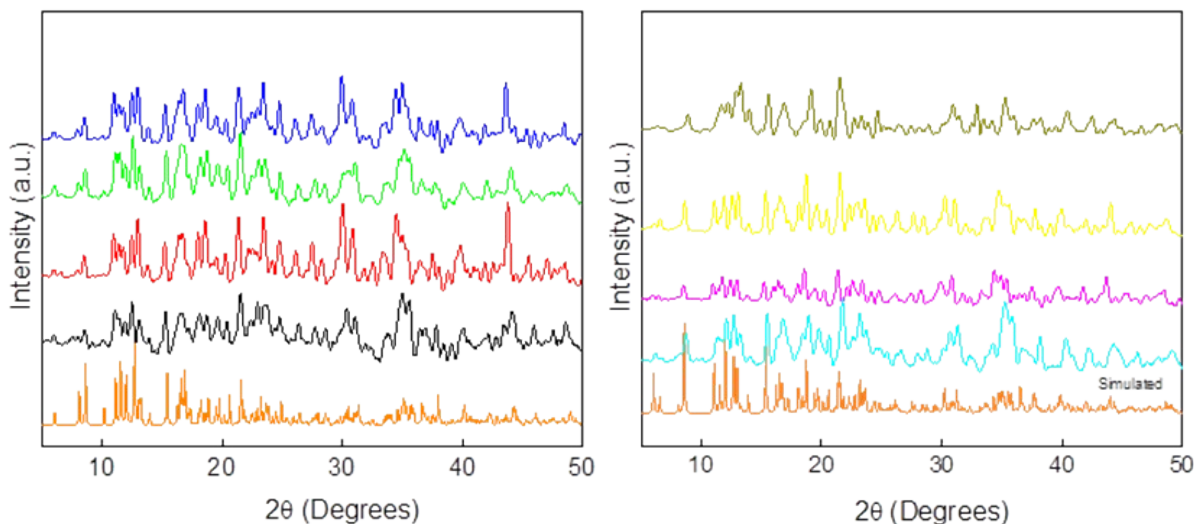

**Figure S2.** The PXRD of  $\{KH[Ln_2(2,3\text{-pzdc})_2(\text{CH}_3\text{OH})(\text{H}_2\text{O})_7][\text{Mo}(\text{CN})_8]\} \cdot 5\text{H}_2\text{O}$  (left) and  $\{KH[Ln_2(2,3\text{-pzdc})_2(\text{CH}_3\text{OH})(\text{H}_2\text{O})_7][\text{W}(\text{CN})_8]\} \cdot 5\text{H}_2\text{O}$  (right). Compounds **1** (black), **2** (red), **3** (green), **4** (blue), **5** (light blue), **6** (pink), **7** (yellow), **8** (tan) simulated (orange).

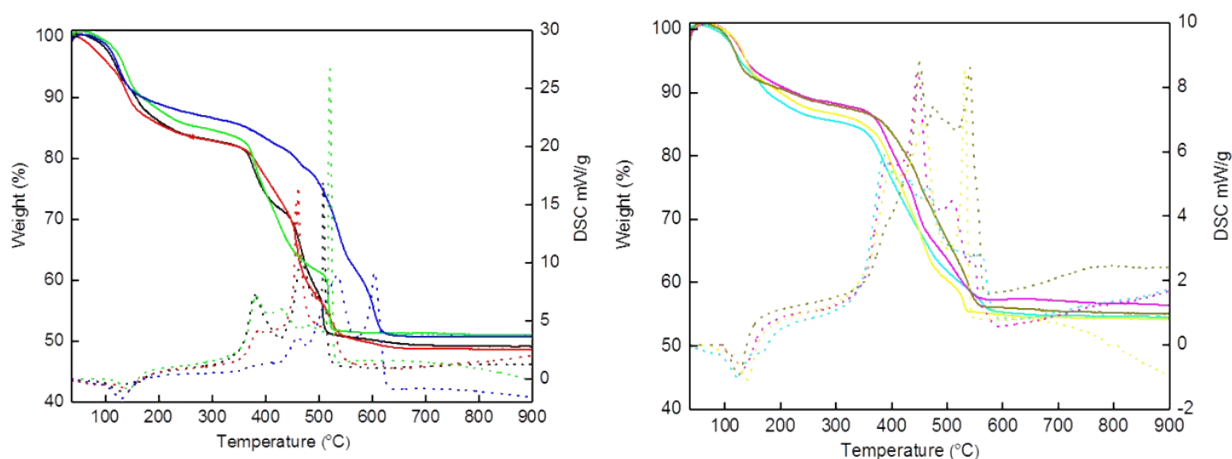

**Figure S3.** The TGA (line) and the DSC curves (dot) of  $\{KH[Ln_2(2,3\text{-pzdc})_2(\text{CH}_3\text{OH})(\text{H}_2\text{O})_7][\text{Mo}(\text{CN})_8]\} \cdot 5\text{H}_2\text{O}$  (left) and  $\{KH[Ln_2(2,3\text{-pzdc})_2(\text{CH}_3\text{OH})(\text{H}_2\text{O})_7][\text{W}(\text{CN})_8]\} \cdot 5\text{H}_2\text{O}$  (right). Compounds **1** (black), **2** (red), **3** (green), **4** (blue), **5** (light blue), **6** (pink), **7** (yellow), **8** (tan).

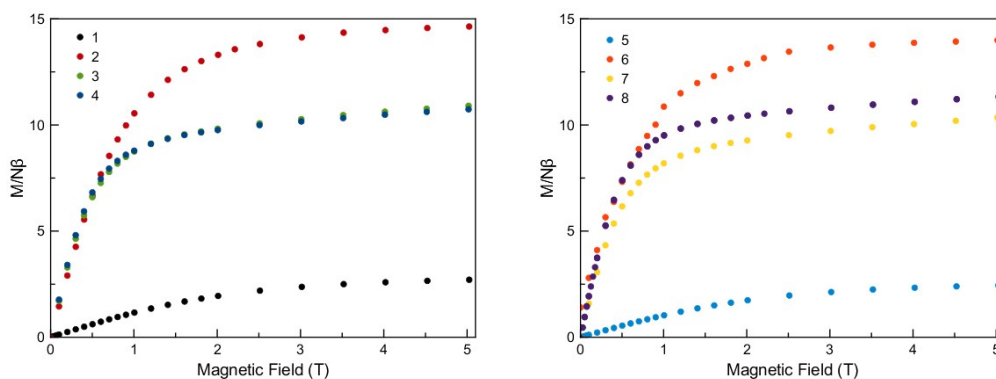

**Figure S4.** Temperature dependence of the magnetization at 2 K of  $\{KH[Ln_2(2,3\text{-pzdc})_2(\text{CH}_3\text{OH})(\text{H}_2\text{O})_7][\text{Mo}(\text{CN})_8]\} \cdot 5\text{H}_2\text{O}$ , **1–4** (left) and  $\{KH[Ln_2(2,3\text{-pzdc})_2(\text{CH}_3\text{OH})(\text{H}_2\text{O})_7][\text{W}(\text{CN})_8]\} \cdot 5\text{H}_2\text{O}$ , **5–8** (right).

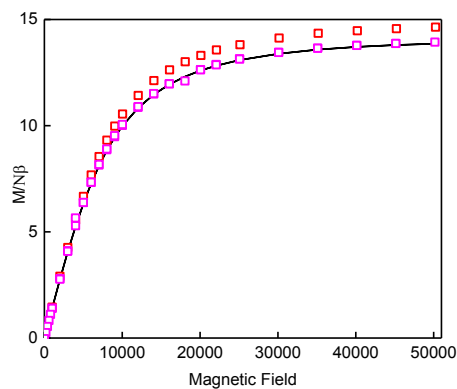

**Figure S5.** Field dependent of the magnetization of the **2** (red) and **6** (pink) as measured at 2 K. Solid line represents the calculated Brillouin curve for two non-interacting  $\text{Gd}^{3+}$  ions.

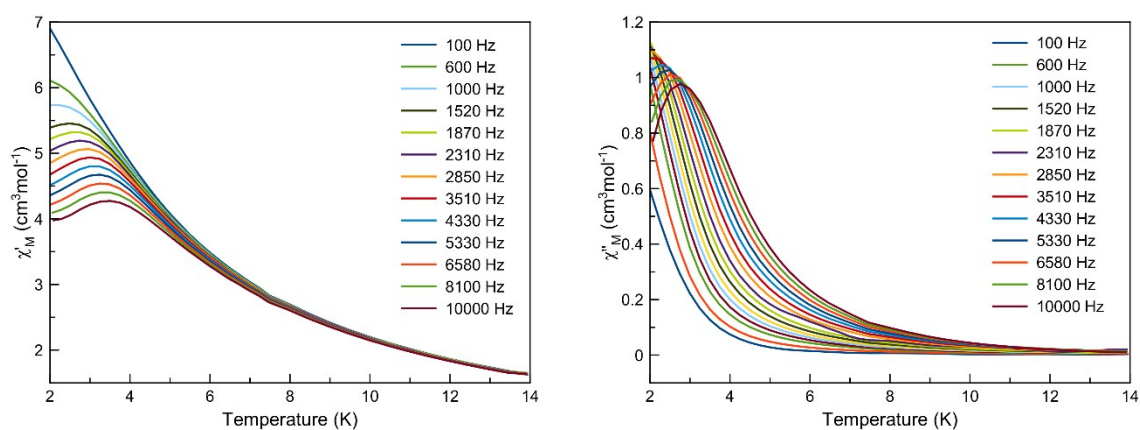

**Figure S6.** Field dependence of  $\chi'_M$  and  $\chi''_M$  of **4** in 1 KOe *dc* applied field.

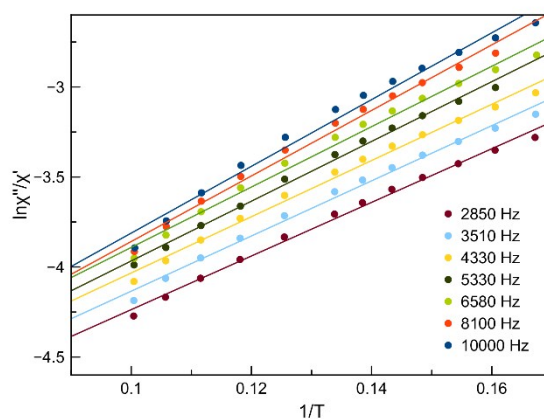

**Figure S7.**  $\text{Ln}(\chi''_M/\chi'_M)$  vs  $1/T$  plots for **4** under 1 KOe *dc*-applied field for frequencies in the range of 2850–10000 Hz. The solid lines are the best linear fits.

states = 1,2  $M_{max}=2.8511$

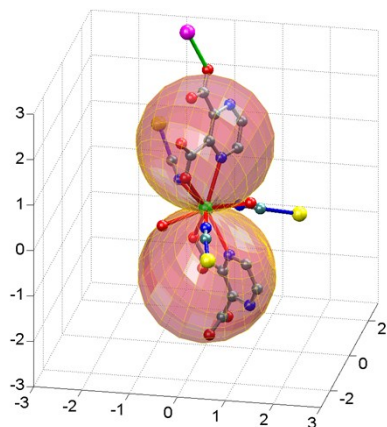

states = 3,4  $M_{max}=1.705$

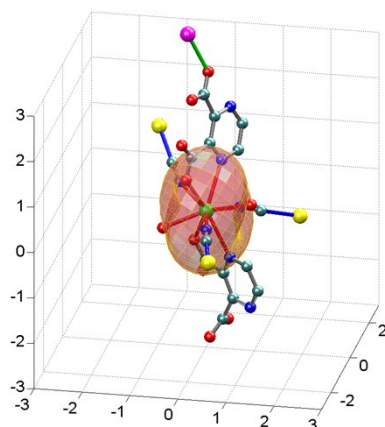

states = 5,6  $M_{max}=1.6599$

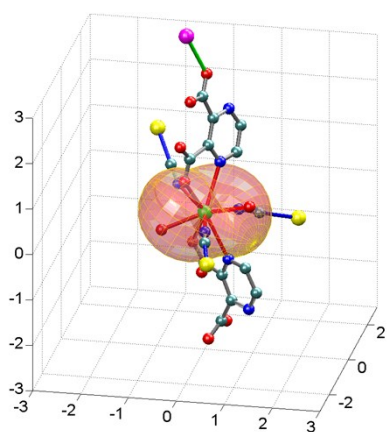

states = 7,8  $M_{max}=1.4643$

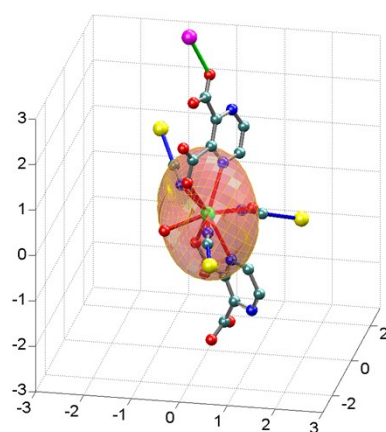

states = 9,10  $M_{max}=2.2144$

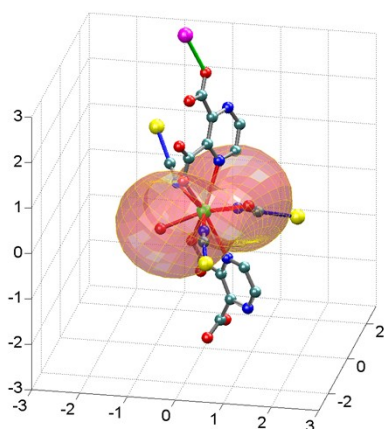

**Figure S8.** The polar maps of the state-specific magnetization functions for the  $\text{Nd}^{3+}$  site 1.

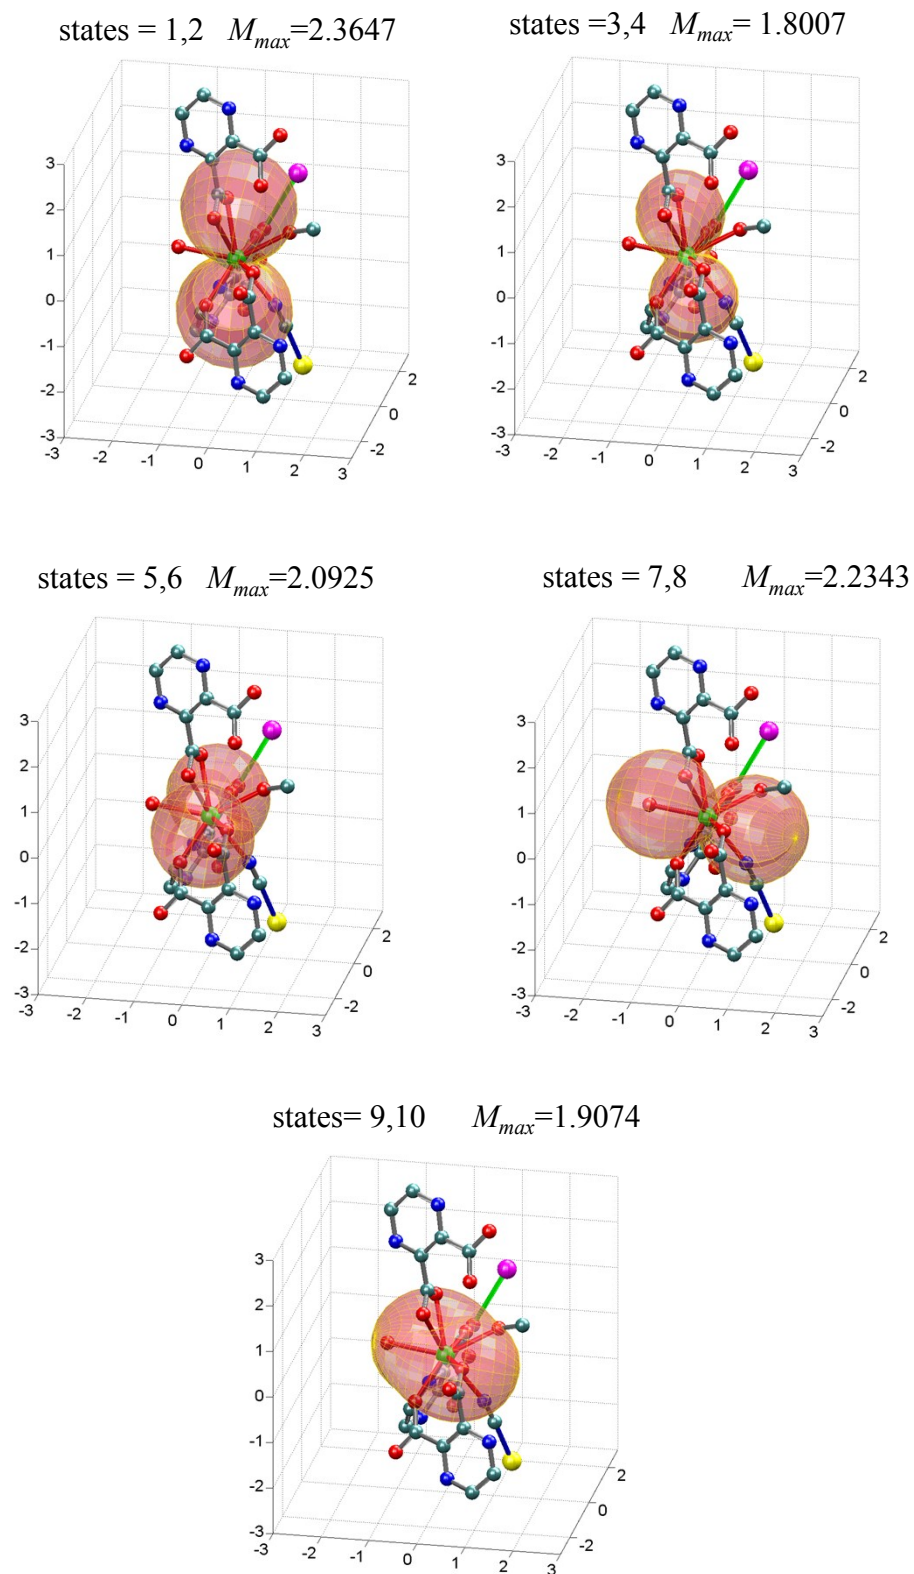

**Figure S9.** The polar maps of the state-specific magnetization functions for the  $\text{Nd}^{3+}$  site 2.

states = 1,2  $M_{max} = 8.966$

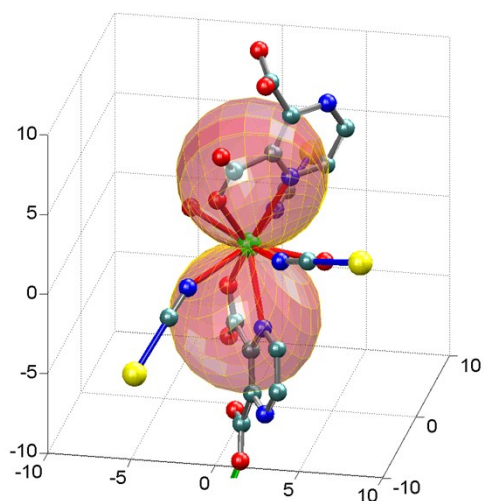

states = 3,4  $M_{max} = 6.69$

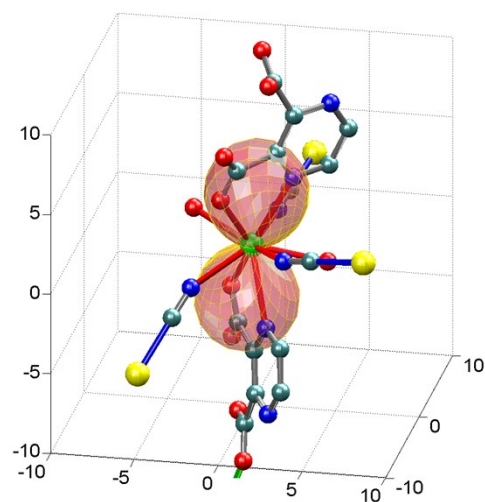

states = 5,6  $M_{max} = 3.24$

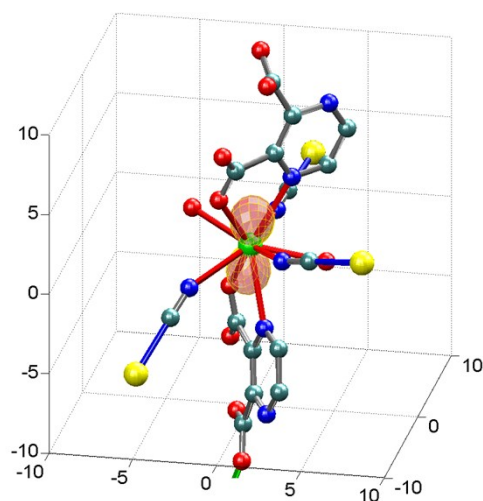

**Figure S10.** The magnetization polar maps for the states with sizeable effective moment on the  $\text{Tb}^{3+}$  site 1. Although the states are not organized in rigorously degenerate couples, there are quasi-doublet sequences with closely similar anisotropy features, being represented together (e.g. states 1 and 2, displaying only the #1 map). The  $M_{max}$  extensions of the lobes for the #5 to #11 states are respectively: 0.569, 0.566, 0.049, 0.277, 0.292, 0.885, 0.889  $\mu\text{B}$ , being barely visible in the chosen representation scale.



states = 1,2  $M_{max}=8.95$

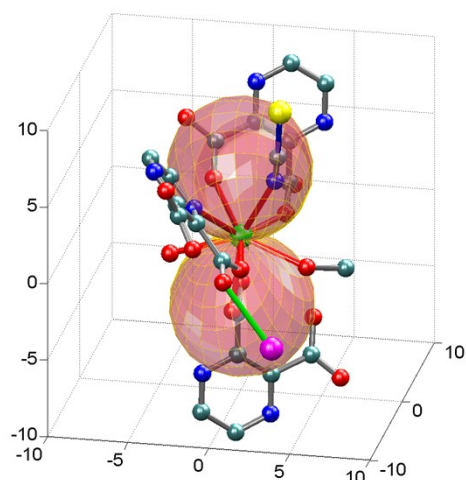

state = 3, 4  $M_{max}=4.94$

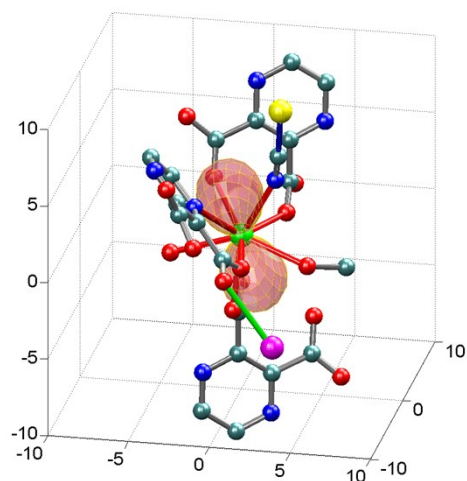

states = 12, 13  $M_{max}=5.33$

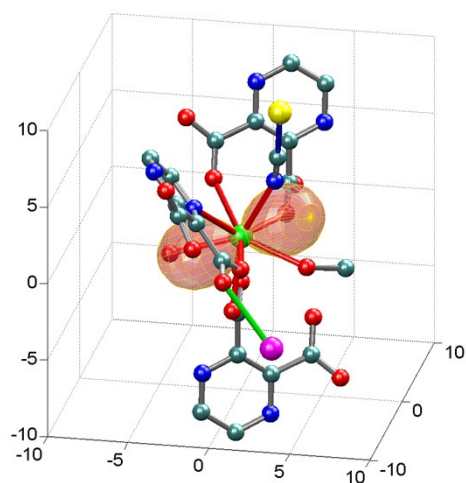

**Figure S11.** The magnetization polar maps for the states with sizeable effective moment on the Tb<sup>3+</sup> site 2. The states #7 to #13 states have small lobes, with the following  $M_{max}$  extensions: 0.145, 0.145, 0.017, 0.065, 0.039, 0.304, 0.326  $\mu_B$ .

states = 1, 2  $M_{max}=9.949$

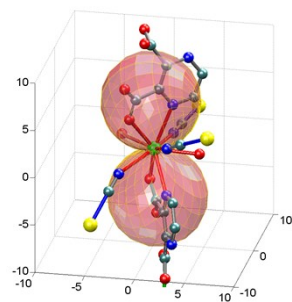

states = 3, 4  $M_{max}=8.649$

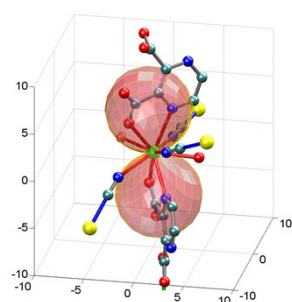

states = 5, 6  $M_{max}=7.244$

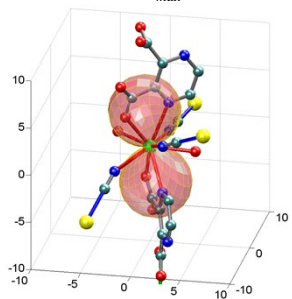

states = 7, 8  $M_{max}=5.6757$

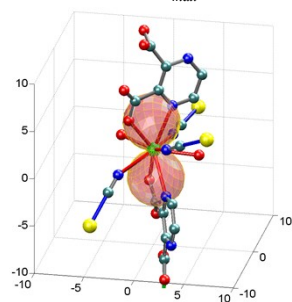

states 9, 10  $M_{max}=3.788$

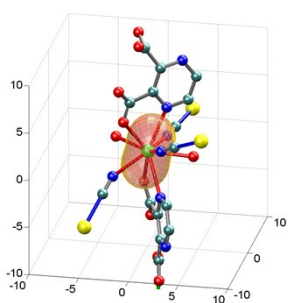

states = 11, 12  $M_{max}=6.2108$

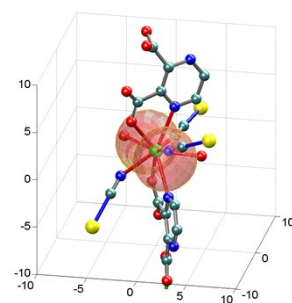

states = 13, 14  $M_{max}=7.492$

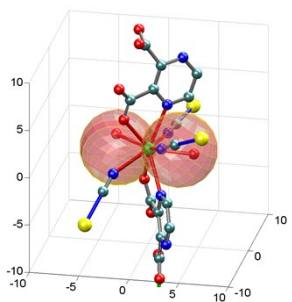

states = 15, 16  $M_{max}=8.676$

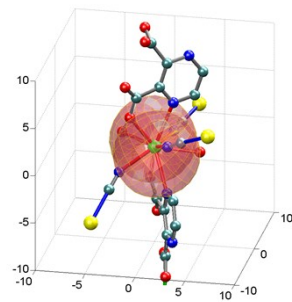

**Figure S12.** The magnetization polar maps for the states of the  $\text{Dy}^{3+}$  site 1.



states = 1, 2  $M_{max}=9.851$

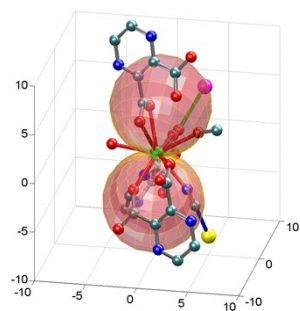

states = 3, 4  $M_{max}=8.4113$

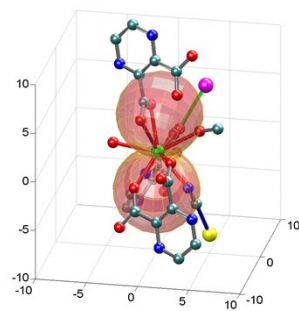

states = 5, 6  $M_{max}=7.078$

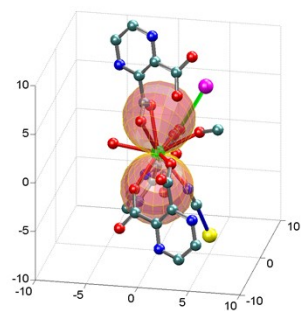

states = 7, 8  $M_{max}=5.862$

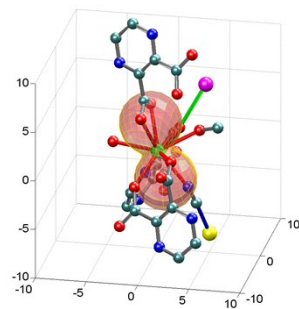

states = 9, 10  $M_{max}=5.752$

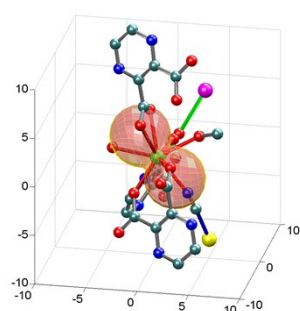

states = 11, 12  $M_{max}=5.186$

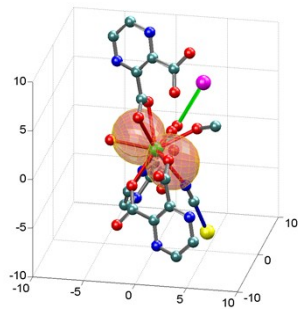

states = 13, 14  $M_{max}=6.56$

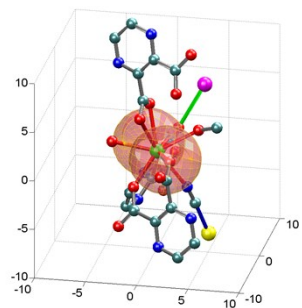

states = 15, 16  $M_{max}=9.591$

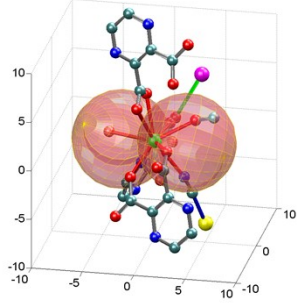

**Figure S13.** The magnetization polar maps for the states of the  $\text{Dy}^{3+}$  site 2.

The Ligand Field (LF) analysis is done fitting one-electron part of the *ab initio* computed spectral terms to the following phenomenological Hamiltonian:

$$\hat{H}_{LF} = \sum_{k=2,4,6} \sum_{q>0}^k \sqrt{\frac{4\pi}{2k+1}} \left[ B_q^k (Y_{k,q} + (-1)^q Y_{k,-q}) + i B_{-q}^k (Y_{k,-q} - (-1)^q Y_{k,q}) \right] + \sum_{k=2,4,6} \sqrt{\frac{4\pi}{2k+1}} B_0^k Y_{k,0}$$

The  $B_q^k$  numeric parameters resulted for the two sites are given in Tables S1 and S2..

**Table S1.** The Ligand Field  $B_q^k$  parameters (in cm<sup>-1</sup>) resulted from the Ligand Field analysis of site 1.

|                   |                   |                   |                   | B <sub>2,-2</sub> | B <sub>2,-1</sub> | B <sub>2, 0</sub> | B <sub>2,+1</sub> | B <sub>2,+2</sub> |                   |                   |                   |                   |
|-------------------|-------------------|-------------------|-------------------|-------------------|-------------------|-------------------|-------------------|-------------------|-------------------|-------------------|-------------------|-------------------|
|                   |                   |                   |                   | -283.8            | -83.4             | -337.1            | -178.3            | -87.9             |                   |                   |                   |                   |
|                   |                   |                   |                   |                   |                   |                   |                   |                   |                   |                   |                   |                   |
|                   |                   | B <sub>4,-4</sub> | B <sub>4,-3</sub> | B <sub>4,-2</sub> | B <sub>4,-1</sub> | B <sub>4, 0</sub> | B <sub>4,+1</sub> | B <sub>4,+2</sub> | B <sub>4,+3</sub> | B <sub>4,+4</sub> |                   |                   |
|                   |                   | -107.1            | -214.2            | 471.1             | 121.2             | 501.8             | 11.7              | -144.3            | -277.6            | 94.0              |                   |                   |
|                   |                   |                   |                   |                   |                   |                   |                   |                   |                   |                   |                   |                   |
| B <sub>6,-6</sub> | B <sub>6,-5</sub> | B <sub>6,-4</sub> | B <sub>6,-3</sub> | B <sub>6,-2</sub> | B <sub>6,-1</sub> | B <sub>6, 0</sub> | B <sub>6,+1</sub> | B <sub>6,+2</sub> | B <sub>6,+3</sub> | B <sub>6,+4</sub> | B <sub>6,+5</sub> | B <sub>6,+6</sub> |
| 496.4             | -175.8            | -430.3            | -193.9            | -15.4             | 205.4             | 478.6             | -142.8            | -152.6            | 267.8             | -31.5             | 233.3             | -362.6            |

**Table S2.** The Ligand Field  $B_q^k$  parameters (in cm<sup>-1</sup>) resulted from the Ligand Field analysis of site 2.

|                   |                   |                   |                   | B <sub>2,-2</sub> | B <sub>2,-1</sub> | B <sub>2,0</sub> | B <sub>2,+1</sub> | B <sub>2,+2</sub> |                   |                   |                   |                   |
|-------------------|-------------------|-------------------|-------------------|-------------------|-------------------|------------------|-------------------|-------------------|-------------------|-------------------|-------------------|-------------------|
|                   |                   |                   |                   | 188.6             | -478.8            | -29.8            | 112.7             | -364.9            |                   |                   |                   |                   |
|                   |                   |                   |                   |                   |                   |                  |                   |                   |                   |                   |                   |                   |
|                   |                   | B <sub>4,-4</sub> | B <sub>4,-3</sub> | B <sub>4,-2</sub> | B <sub>4,-1</sub> | B <sub>4,0</sub> | B <sub>4,+1</sub> | B <sub>4,+2</sub> | B <sub>4,+3</sub> | B <sub>4,+4</sub> |                   |                   |
|                   |                   | 141.9             | 386.6             | -150.2            | 53.8              | -339.1           | -45.7             | -134.6            | -253.4            | 110.6             |                   |                   |
|                   |                   |                   |                   |                   |                   |                  |                   |                   |                   |                   |                   |                   |
| B <sub>6,-6</sub> | B <sub>6,-5</sub> | B <sub>6,-4</sub> | B <sub>6,-3</sub> | B <sub>6,-2</sub> | B <sub>6,-1</sub> | B <sub>6,0</sub> | B <sub>6,+1</sub> | B <sub>6,+2</sub> | B <sub>6,+3</sub> | B <sub>6,+4</sub> | B <sub>6,+5</sub> | B <sub>6,+6</sub> |
| 630.7             | 284.5             | -73.2             | -181.5            | -173.3            | -419.7            | -174.7           | -342.8            | -282.2            | 16.6              | 135.2             | 305.7             | -88.9             |

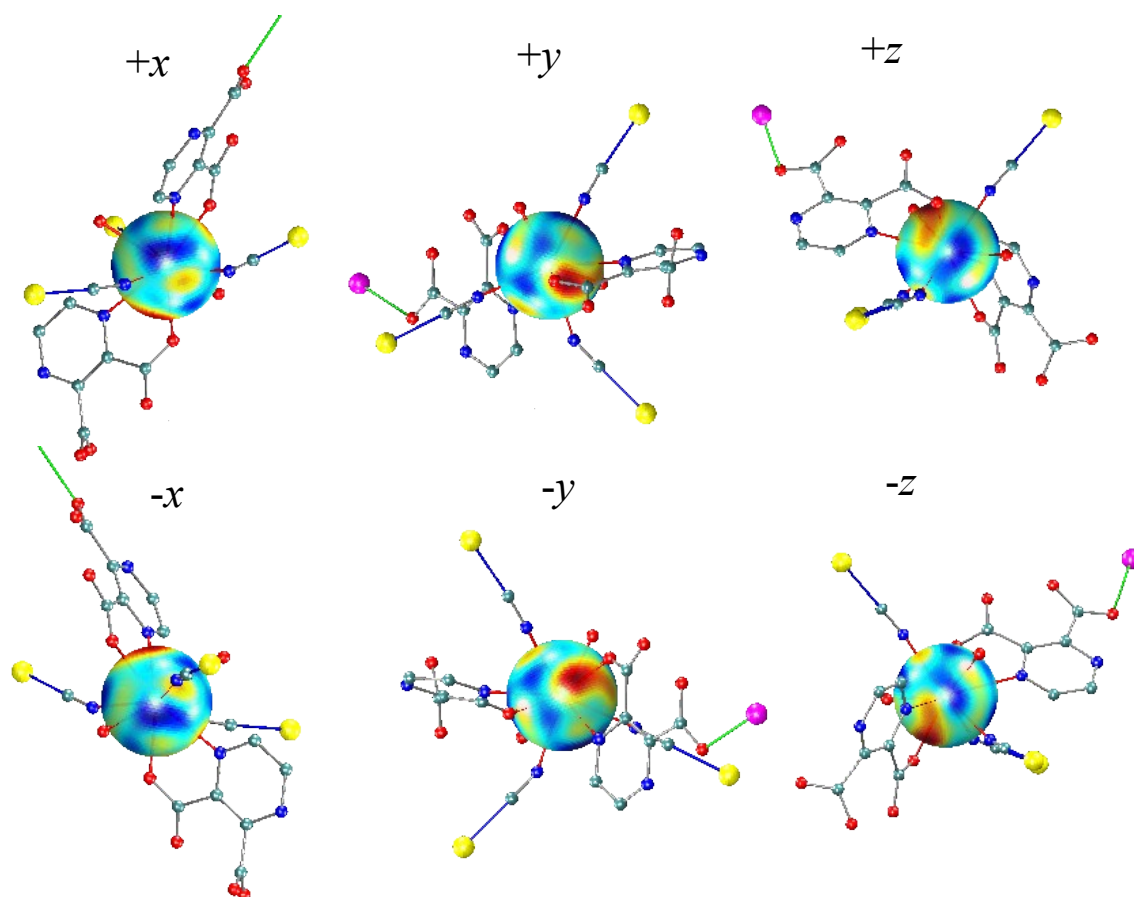

**Figure S14.** Colormap of the Ligand Field potential for site 1. Different views (along the opposite directions of Cartesian axes). Note the inversion relationships between the elements of upper and lower rows.

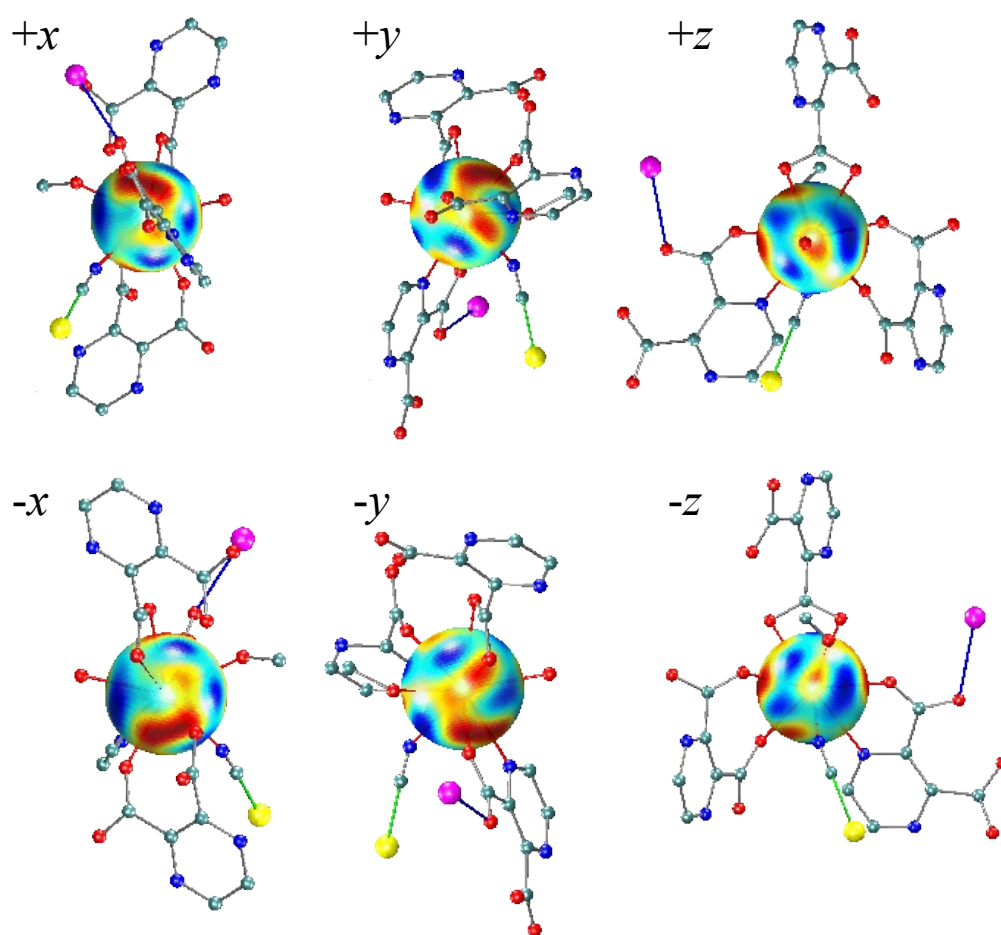

**Figure S15.** Colormap of the Ligand Field potential for site 2. Different views (along the opposite directions of Cartesian axes). Note the inversion relationships between the elements of upper and lower rows.

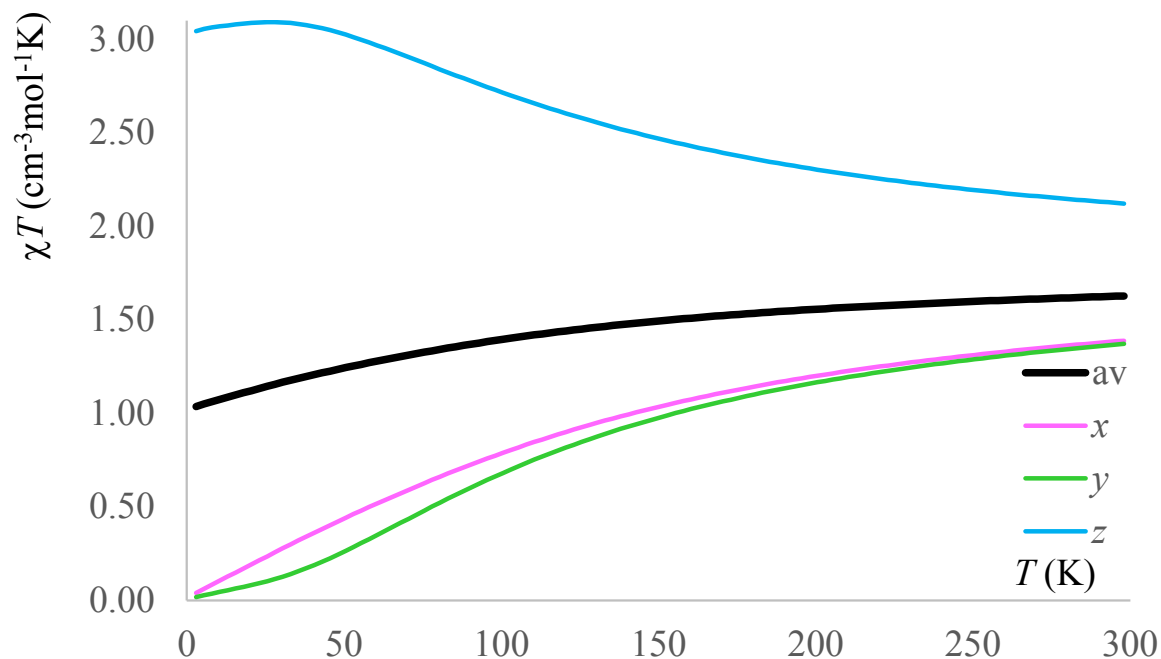

**Figure S16.** Simulated magnetic susceptibility, shown as  $T$  vs.  $\chi_M T$  curves for the  $\text{Nd}^{3+}$  site 1: averaged dependence and anisotropic behavior on Cartesian axes, selecting as  $z$  the easy axis of the ground state level.

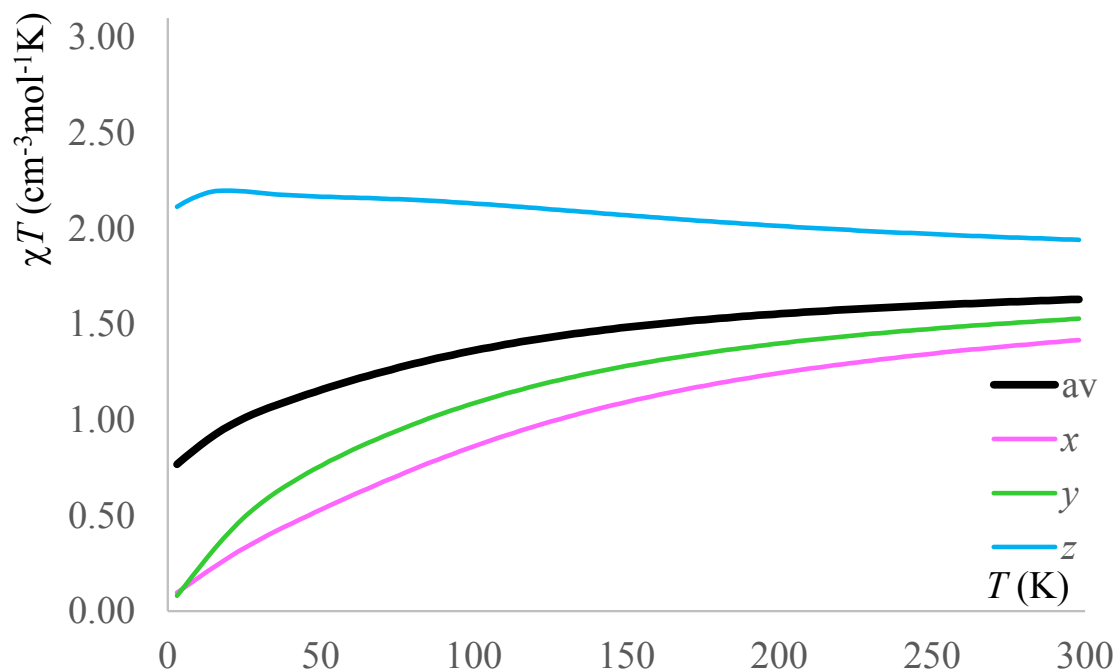

**Figure S17.** Simulated magnetic susceptibility, shown as  $T$  vs.  $\chi_M T$  curves for the  $\text{Nd}^{3+}$  site 2: averaged dependence and anisotropic behavior on Cartesian axes, selecting as  $z$  the easy axis of the ground state level.

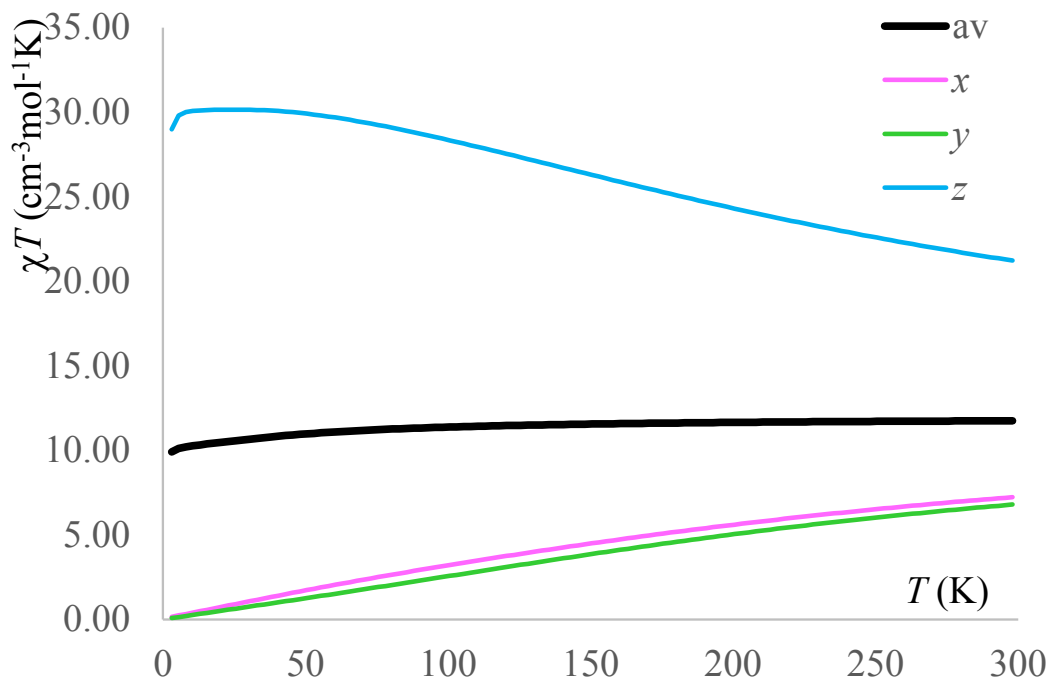

**Figure S18.** Simulated magnetic susceptibility, shown as  $T$  vs.  $\chi_M T$  curves for the  $\text{Tb}^{3+}$  site 1: averaged dependence and anisotropic behavior on Cartesian axes, selecting as  $z$  the easy axis of the ground state level.

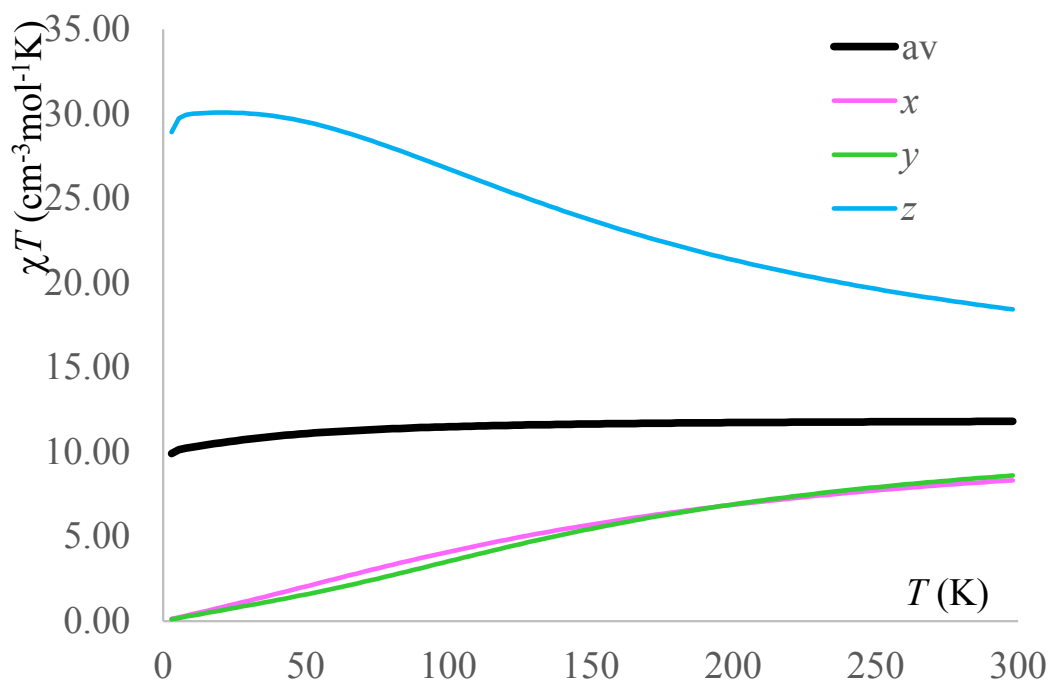

**Figure S19.** Simulated magnetic susceptibility, shown as  $T$  vs.  $\chi_M T$  curves for the  $\text{Tb}^{3+}$  site 2: averaged dependence and anisotropic behavior on Cartesian axes, selecting as  $z$  the easy axis of the ground state level.



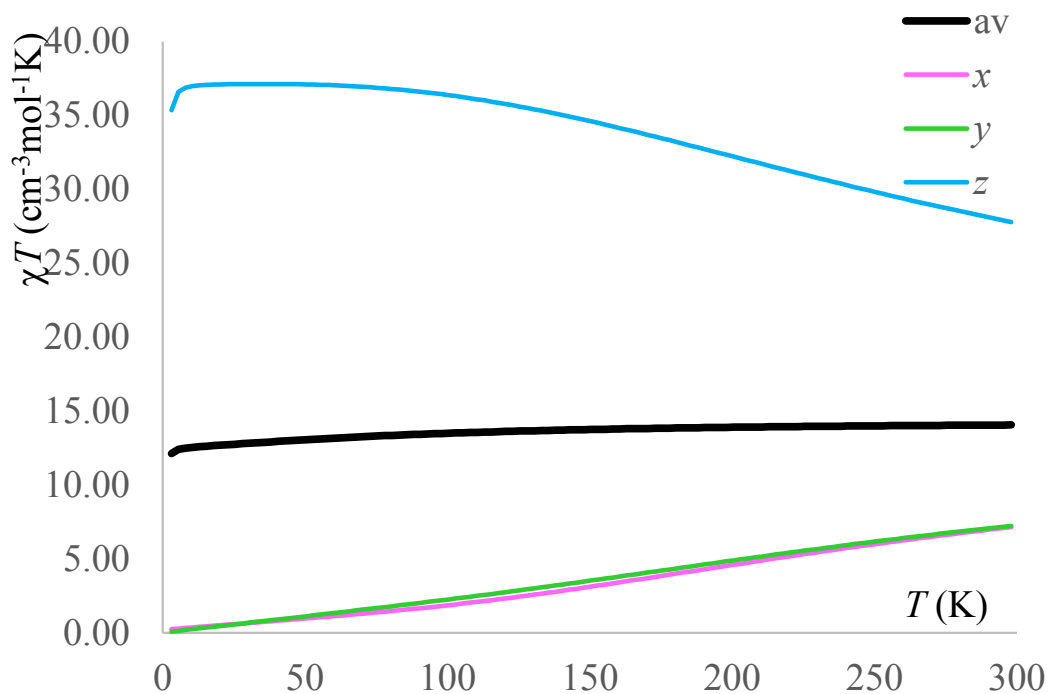

**Figure S20.** Simulated magnetic susceptibility, shown as  $T$  vs.  $\chi_M T$  curves for the  $\text{Dy}^{3+}$  site 1: averaged dependence and anisotropic behavior on Cartesian axes, selecting as  $z$  the easy axis of the ground state level.

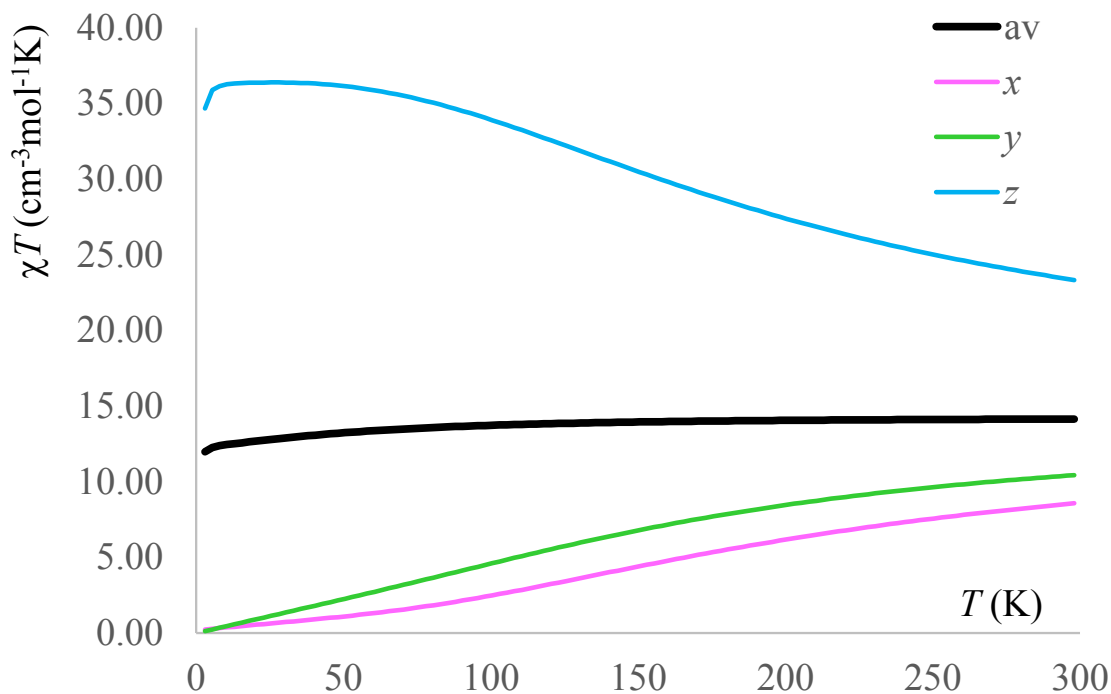

**Figure S21.** Simulated magnetic susceptibility, shown as  $T$  vs.  $\chi_M T$  curves for the  $\text{Dy}^{3+}$  site 2: averaged dependence and anisotropic behavior on Cartesian axes, selecting as  $z$  the easy axis of the ground state level.
